# Supplementary material
Source: publisher figshare collection journal article supplement (https://karger.figshare.com/ndownloader/files/8712151)
Supplement: Supplementary file 1 [file 8712151]

**Supplementary Table 1. Clinical characteristics of MCL patients**

| Patient number | source | age/sex | Cytogenetics (FISH)     |
|----------------|--------|---------|-------------------------|
| 1              | BM     | 74/M    | IGH/BCL-1 (CCND1) 59.8% |
| 2              | PB     | 63/F    | IGH/BCL-1 (CCND1) 34.0% |

## Supplementary Figure 1

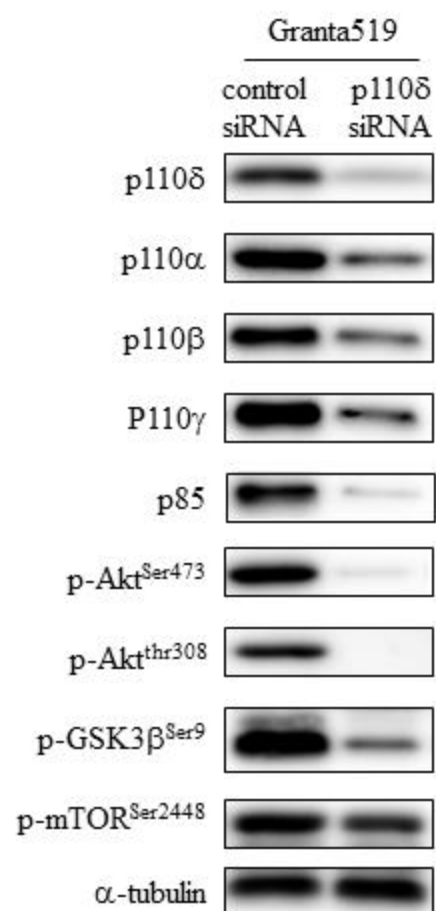

**Supplementary Figure 1. p110 $\delta$  knockdown abrogated p85 and decreased other PI3K isoforms expression.** Granta 519 cells were transfected with p110 $\delta$  siRNA or control siRNA as described in Materials and Methods. After 48 hours of transfection, clarified cell lysates were probed with antibodies to p110 $\delta$ , p110 $\alpha$ , p110 $\beta$ , p110 $\gamma$ , p85, p-Akt<sup>Ser473</sup>, p-Akt<sup>Thr308</sup>, p-GSK3 $\beta$ <sup>Ser9</sup>, p-mTOR<sup>Ser2448</sup> and  $\alpha$ -tubulin. Western blot results shown are representative of three independent experiments.
